# Supplementary material for: Development and Validation of a Novel Stemness-Index-Related Long Noncoding RNA Signature for Breast Cancer Based on Weighted Gene Co-Expression Network Analysis
Source: Front Genet. 2022 Feb 22;13:760514. doi: 10.3389/fgene.2022.760514 (PMC8902307; doi:10.3389/fgene.2022.760514)
Supplement: Supplementary file 5 [file DataSheet1.CSV]

	logFC	AveExpr	t	P.Value	adj.P.Val	B
FAM83H-AS1	1.9355651960175	3.89480081546721	21.1563653545555	2.18729172565807e-84	7.18681567001938e-84	181.135726919448
MAFG-AS1	1.11244087169015	2.24732394714282	14.7612838761483	2.37694543326034e-45	3.94837046969356e-45	91.5088794998625
RHPN1-AS1	0.958848623180963	1.7247903513194	14.2621826621053	1.13336453060357e-42	1.7835578665814e-42	85.3686566813964
RP6-65G23.3	0.915384709116549	1.85044570424672	13.1471875877934	6.34107438137601e-37	9.33980906419422e-37	72.1989359812478
LINC00665	0.780803508786934	2.59056190065411	11.1125347120478	2.40637645282024e-27	2.94879737456251e-27	50.2817817422823
RP11-429J17.7	0.590340032191381	0.85307193844676	11.1860451315353	1.14036966218476e-27	1.40896912807126e-27	51.0229504493322
RP1-228H13.5	0.586829381110539	1.39185420621097	12.1874018901599	2.97600392194127e-32	3.97243380651982e-32	61.5046674723946
RP11-38H17.1	-0.587069980168262	0.29439469771356	-15.2344044469399	6.02240548955053e-48	1.04691816359047e-47	97.4626093765742
CTC-786C10.1	-0.592831983937152	0.519399479741331	-15.7511506087845	7.63292601614257e-51	1.40879313507817e-50	104.107979243116
CTD-2078B5.2	-0.595580526806846	0.27242396189279	-20.1650890591238	7.45180943072204e-78	2.2060307126593e-77	166.125928829831
A2M-AS1	-0.600550361285984	0.671393196855913	-19.8636545424408	6.74828522342302e-76	1.92165455409855e-75	161.629997115539
RP11-182J1.17	-0.603313677160074	0.376280260530914	-26.9943511058598	3.58284184502712e-125	2.74684541452079e-124	274.901208530685
RP11-286H15.1	-0.61625718110941	0.26543713661359	-19.4787765671349	2.0261690783573e-73	5.36127924273305e-73	155.938595205469
RP11-384P7.7	-0.618798172895524	0.15425886167513	-32.7303568003368	2.25816000390316e-167	4.21993650729402e-166	371.966559980141
RP11-775C24.5	-0.61880055489872	2.28969187930294	-9.79067240243256	8.25984700106168e-22	9.31960095591487e-22	37.6447302833471
RP11-427J23.1	-0.619190489058176	0.144537563422049	-26.5640305448451	4.59145328432049e-122	3.12010120911779e-121	267.75450526088
LINC01186	-0.625862659517013	0.161440652554613	-23.8025266218009	1.86747910132302e-102	7.86445424359977e-102	222.666651540606
RP11-138I17.1	-0.637754570651822	0.102918402417302	-38.6931939555871	1.28159560609403e-211	7.66394172444229e-210	473.75610574214
AC003986.6	-0.64221945929434	0.165513631449293	-25.7400137322933	3.78225948775866e-116	2.21744232713694e-115	254.150917254912
CTD-2135D7.5	-0.649287701933775	0.198178459359797	-35.6341429665827	5.86294059295729e-189	2.19127404661779e-187	421.623883827524
RP11-554A11.4	-0.651690956619706	0.29445872234448	-25.4632209005373	3.57797919644067e-114	2.05733803795338e-113	249.607532589879
AC116035.1	-0.652075413290481	0.16045408097333	-32.6827527471883	5.09800077156719e-167	8.9664837099917e-166	371.153037433768
HID1-AS1	-0.65621709114916	0.340017654857245	-26.9543480670976	6.97621025007579e-125	5.21471716193165e-124	274.235695087538
RP11-696F12.1	-0.660624321854505	0.215648858998848	-24.4028405782029	1.16007614994523e-106	5.59456078763909e-106	232.338168974527
CADM3-AS1	-0.667300704509333	0.220648210696861	-26.2550778233276	7.68473140845804e-120	4.88879721516799e-119	262.64096186627
FGF13-AS1	-0.694042907409758	0.19473929634433	-29.8865233708781	2.5868379130017e-146	2.6671190896121e-145	323.52509596028
RP4-612B15.3	-0.703641238343299	0.823484241457698	-22.3034882772786	4.07947814877422e-92	1.48751703229694e-91	198.899451105188
ALDH1L1-AS2	-0.704070605433835	0.102416304651491	-30.3008578936246	2.2714668109753e-149	2.42560205886291e-148	330.555426072694
EMX2OS	-0.715823558375639	0.34728178095152	-24.1234673293905	1.06308166395102e-104	4.67443261060815e-104	227.827186051649
RP11-1070N10.3	-0.720297109844896	0.359934192773245	-19.6457055716563	1.7183478036466e-74	4.71363296596635e-74	158.400183920467
RP5-864K19.4	-0.730640231561065	0.690241724801016	-20.7914547895796	5.77214159738622e-82	1.81670561854577e-81	175.571498429572
RP11-823E8.3	-0.739700013683022	0.237964591112916	-33.6102601212296	6.51503899466863e-174	1.49845896877378e-172	387.01095584864
RP11-180N14.1	-0.742853450102685	0.604024965243915	-12.8601374603197	1.68613655979502e-35	2.40073729227958e-35	68.9363332668448
RP11-64C12.8	-0.746402546966849	0.186019220382272	-34.4295635163267	5.27104309122988e-180	1.43276534934339e-178	401.025494800856
LINC01140	-0.75217502250324	0.379550616214726	-24.3378351460034	3.32420195577895e-106	1.52913289965832e-105	231.287013231878
ADIRF-AS1	-0.771750714332926	1.01547350832107	-14.7335230108443	3.36235904408491e-45	5.52387557242521e-45	91.1635160370781
RP11-92C4.6	-0.778991622394412	0.967190640503219	-13.922914368964	6.89327052933175e-41	1.06792118563223e-40	81.2797615900109
RP11-158M2.3	-0.784618677918871	0.476921149919309	-26.9301078912078	1.04455358790608e-124	7.61759811668093e-124	273.832533745202
RP11-71E19.1	-0.793141712940781	0.165623790287288	-32.9458732883145	5.65516075219361e-169	1.20778076064706e-167	375.650215000542
TRIM52-AS1	-0.808735493145356	2.33180031255625	-14.5550152272949	3.09442415490412e-44	4.9477691032959e-44	88.953473122068
RP11-1100L3.8	-0.817801417478352	0.720629517774766	-11.538094095065	3.02362194664713e-29	3.86351693182689e-29	54.6268158533823
RP5-839B4.8	-0.841603719824276	0.187128932566825	-22.7636478686979	2.90847424970603e-95	1.11491512905398e-94	206.132812666595
B4GALT1-AS1	-0.852595893590485	1.04840565782929	-18.8524985987406	1.92766392804718e-69	4.76340094616616e-69	146.800485107613
RP11-2E11.9	-0.868967193083848	0.844546035856379	-18.2432623716824	1.22656863887612e-65	2.88774821278709e-65	138.065148519836
RP4-575N6.4	-0.870635128575678	0.549675477261706	-21.2390117040473	6.15019206658931e-85	2.04323047545578e-84	182.401971852885
RP11-1024P17.1	-0.878633794326602	0.442166738378387	-30.7142944655916	2.00224007177924e-152	2.39467912584798e-151	337.582047771273
AC022007.5	-0.887812676580854	1.56515760800881	-15.2916229691694	2.89798795055427e-48	5.09704939538662e-48	98.1912065935019
LINC01230	-0.897033960413898	0.167170903361175	-25.199812307836	2.68118970522307e-112	1.48458467011426e-111	245.296957853643
LINC01537	-0.899759475168855	0.208620620986159	-39.0850872604372	1.65195680682205e-214	1.23483771309948e-212	480.404327613076
HOXB-AS1	-0.950873636081141	1.37921599831536	-11.8785311144915	8.31426293342065e-31	1.07153647288482e-30	58.196070155167
RBPMS-AS1	-0.958697133070587	0.666030157403033	-24.6798177987196	1.29441145834293e-108	6.67291424214719e-108	236.827075380157
AL035610.1	-0.958736869065098	0.166446576539883	-39.3617726806255	1.51385628952053e-216	2.2632151528332e-214	485.09279790862
RP11-175K6.1	-1.00655743713362	0.311921268927164	-38.2230865766917	3.79313018967467e-208	1.89024321118788e-206	465.770100712539
LINC00968	-1.01231411957136	0.233951684359971	-26.553738772137	5.44664365658883e-122	3.61899211848902e-121	267.583922435211
PCAT19	-1.03639942810565	1.10547695193737	-20.3550208090467	4.28503897300896e-79	1.29416833629261e-78	168.975617035612
RP11-172E9.2	-1.0456864480093	0.182495674075771	-30.4292687282628	2.55863418478611e-150	2.94242931250403e-149	332.73668506818
RP11-389C8.2	-1.06748824622591	1.33563223301698	-19.8180505453091	1.33046560787698e-75	3.75291713920016e-75	160.952715924718
SHANK3	-1.1010929615405	2.1491771306777	-16.8772117937714	2.28652104820111e-57	4.68266981789132e-57	119.077544086498
RP11-798K3.2	-1.1114716105286	0.148946001709875	-34.9560164871008	6.42366993545964e-184	1.92067731070243e-182	410.029948803541
RP11-561I11.3	-1.13292570356403	0.195473367898057	-32.435948742082	3.47135676064231e-165	5.46281932332658e-164	366.936210130105
LINC01485	-1.13525558532296	0.270974463290207	-29.0334618500409	4.86722048033562e-140	4.40999673824349e-139	309.093240810177
RP11-855A2.5	-1.16113985074663	0.772097124916826	-15.5800774952416	7.05909597542204e-50	1.27919375554618e-49	101.891823754205
MIR22HG	-1.21085518921186	2.34031596966724	-19.4163710170865	5.08264533075958e-73	1.31009564991131e-72	155.021090943706
AC093110.3	-1.23386989218711	0.595751376582459	-30.3299612860382	1.3849132306948e-149	1.53366317028795e-148	331.049696957591
RP5-965F6.2	-1.23815010015758	0.29933637664273	-39.2808638300079	5.96775090159243e-216	5.94785839858712e-214	483.722257051583
RP11-474O21.5	-1.31246056584116	0.771164983556082	-24.6033145615148	4.48787706622494e-108	2.27436481830722e-107	235.585588624832
TRHDE-AS1	-1.43729346636645	0.213128234075432	-35.1649682746573	1.79713400324877e-185	5.97047852190424e-184	413.603132078196
RP1-302G2.5	-1.50171293235037	0.624397026771047	-24.4498645639983	5.41388469524292e-107	2.65369102275022e-106	233.09912806206
RP4-755D9.1	-1.59709814022677	0.48003090036034	-26.8286190024009	5.65619990547575e-124	4.02667564699345e-123	272.145503423129
RP1-193H18.3	-1.72464865846819	0.346425534441161	-27.5981238737079	1.49557398961051e-129	1.20858546727984e-128	284.972793997918
MEOX2-AS1	-1.74382578959716	0.438923927337212	-36.1419882149577	9.91940734303567e-193	4.23700399366809e-191	430.300736649492
RP11-736K20.5	-1.8341444823442	0.906386683868406	-32.1592814372429	3.93138422000566e-163	5.87741940890847e-162	362.211161506609
RP1-28O10.1	-2.45852732397042	0.755893447927052	-31.1453383552727	1.29425197261895e-155	1.6124222492211e-154	344.918660251976
